# Supplementary material for: ZEB1-AS1 initiates a miRNA-mediated ceRNA network to facilitate gastric cancer progression
Source: PubMed Central journal article supplement (PMC6364449; doi:10.1186/s12935-019-0742-0), 2019-02-06
Supplement: 12935_2019_742_MOESM2_ESM.pdf [file 12935_2019_742_MOESM2_ESM.pdf]

Table S1. The sequence information involved in the study

| name                 | sequence                                                                                                                              |
|----------------------|---------------------------------------------------------------------------------------------------------------------------------------|
| LV-sh-Z              | Sense:tCGAATCAGGTCATAGACTAttcaagagaTAGTCTATGACCTGATTGttttttc<br>Antisense:tcgagaaaaaaCGAATCAGGTCATAGACTAtctcttgaaTAGTCTATGACCTGATTGCa |
| miR-149-3P mimics    | Sense:5'-AGGGAGGGACGGGGGCUGUGC-3,<br>Antisense: 5'-ACAGCCCCCGUCCCUCCUUU-3'                                                            |
| miR-149-3p inhibitor | 5'-GCACAGCCCCCGUCCCUCCCU-3'                                                                                                           |
| miR-149-3p-NC        | Sense:5'-UGAGCUAAAUGUGUGCUGGGA-3';<br>Antisense 5'-CCAGCACACAUUUAGCUCAUU-3'                                                           |
| ZEB1-AS1 primer      | Sense:5'- GAACCGGGATGGGAAGTGAC -3';<br>Antisense:5'-GCAAGCGGAACTTCTAGCCT -3'                                                          |
| miR-149-3p primer    | Sense: 5'- GAACCGGGATGGGAAGTGAC -3'<br>Antisense: 5'- GCAAGCGGAACTTCTAGCCT-3'                                                         |
| miR-149-5p primer    | Forward: 5'-AGGGAGGGACGGGGGCT-3'                                                                                                      |
| mir-204-3p primer    | Forward: 5'-TCTGGCTCCGTGTCTTCACTC-3'                                                                                                  |
| miR-204-5p primer    | Forward: 5'-GCTGGGAAGGCAAAGGGAC-3'                                                                                                    |
| miR-610 primer       | Forward: 5'-CGTTCCTTTGTCATCCTATGCCT-3'<br>Forward: CGTGAGCTAAATGTGTGCTGGGA                                                            |
| GAPDH primer         | Sense: 5'- CCTGGCACCCAGCACAAT -3'<br>Antisense: 5'- GGGCCGACTCGTCATAC -3'                                                             |
| U6 primer            | Sense: 5'-CTCGCTTCGGCAGCACA-3'<br>Antisense: 5'-AACGCTTCACGAATTTGCGT-3'                                                               |
