# Supplementary material for: ZEB1-AS1 initiates a miRNA-mediated ceRNA network to facilitate gastric cancer progression
Source: Springer Nature journal article supplement (doi:10.1186/s12935-019-0742-0), 2019-02-06

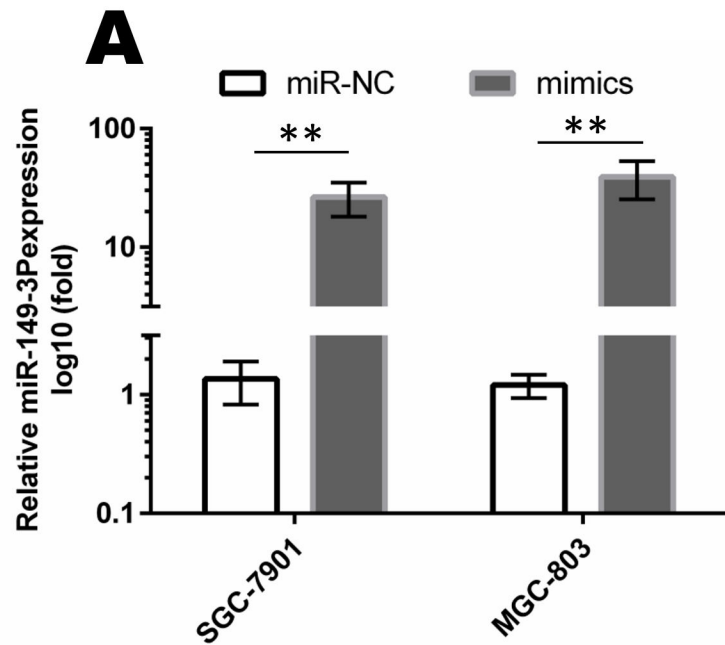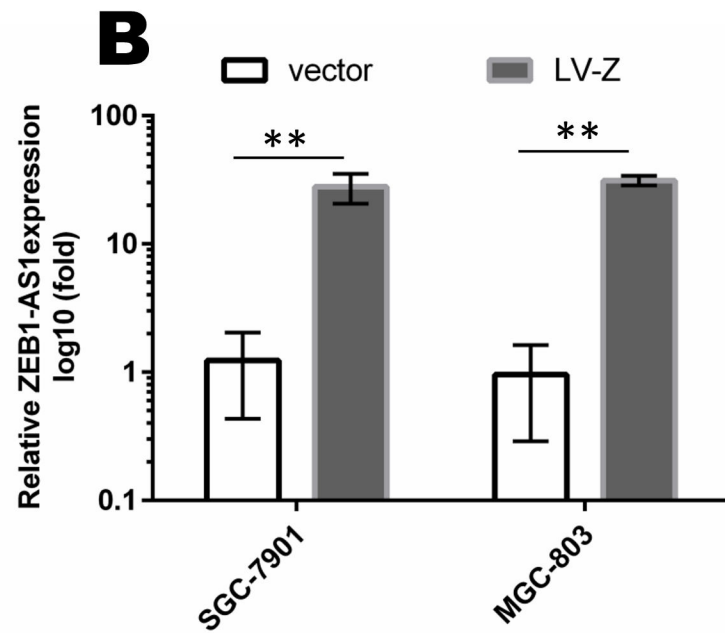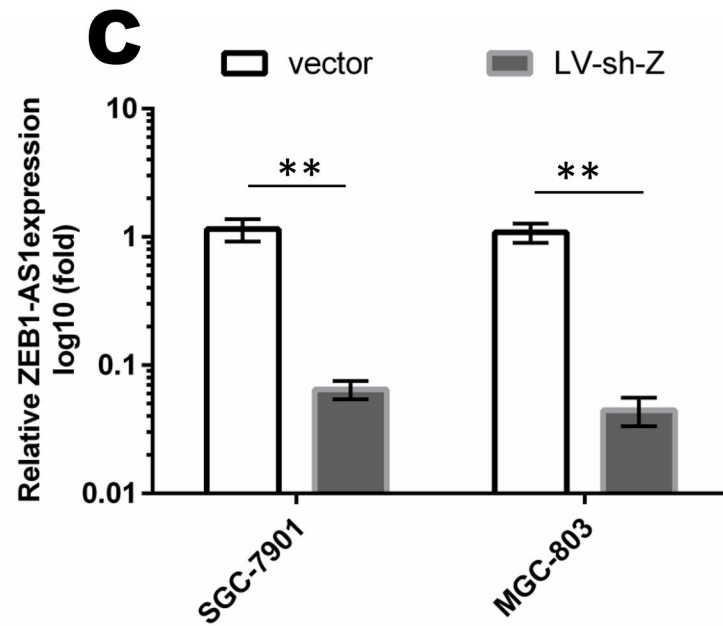

Supplement: MOESM1 [file 16446714]
