# Supplementary material for: ZEB1-AS1 initiates a miRNA-mediated ceRNA network to facilitate gastric cancer progression
Source: Springer Nature journal article supplement (doi:10.1186/s12935-019-0742-0), 2019-02-06
Supplement: MOESM3 [file 16446714]

LV-ZEB1-AS1 sequence

CTTACACCTAGAGGCTCTCGCTCTACGGCCGGAACCTTGTTGCTAGGGACCGGGCGGTTTGCGG  
CAACCGTGGGCACTGCTGAATTTGAATTGAGGGGCGAGGGAAAAGTTTTCTCAGGTGTGGTG  
GGGAGAGGGAGGCGGATGCCGGGAAACCGTAGGGACGCGGTGAGAAAGGCGACGGGCTGTC  
GGAGTTGAAAGGGACGCCTGGTTTTCCCCCAAGCGAACCGGGATGGGAAGTGACTTCAATGA  
GATTGAACTTCAGCTGGATTGAAAGAGAGGCTAGAAGTCCGCTTGCCAGCAGCCTCCTTAGTA  
GAGCGGAATGAGTAATACCCACACGGTGCTTGCTCACTTCCCCATCCGCACCCGGCCCTCACC  
TGCTGTCACCTCGGCCTCCACACCCGGTCCGCGCTCCCCGCCCTTCTCCTCGCGTAGAACCGT  
GGGATCCTAGGTGGCAGGACTCAGAGCTAAGGTATCCACAGGCCATGAATTCCTTCTAAATGA  
GCGGTCATCGCCGTGCAGGACCTTAAGGCAAGAAGCATCGGCTGACAGATGTGATCTCTGAAC  
CTGATAGATTGCTGATTTTATCTTATTTTATCCTTGACTTGGTACAAGTTTTGGGATTTCTGAAAAG  
ACCATACAGATAACCACAAATATCAAGAAAGTCGTCTTCAGTATTAAGTAGAATTTAGATTTAGG  
TTTTCTTCTGCTTCCACCTCCTTCAATAAGGAAACGTCTTTGGGACCAACTTTATGGAATAA  
ATAAGCTGAGCTGTATTTCAAGTAATATAGTTATAAATTAACAATGTAGCAGTTATTGATAGAGA  
AATTGAGAAAAGTAAACGTGACCGGAGTATTGGAAATAACGTAGTACATCACCTAGCACAAAT  
GACACATAGTAGGTGCTCAATAAATTTATGCTTATAATTTTTGTCACCTTCTATGGCAGGATTTTTTT  
ATTAGGTTAAAATTATCTTTTAAACACCTTCCGGAATTTTAGAATATTCATTAATAATGTCTTCAA  
CCTTTCAACTGAAATAAATTTACAGCTGAAGTCTGATGATTTAAAGTTAGAAAAGTTAATCTTGAA  
TATAAATGAACATTTTCTCTCCACATTTTCTTGGGCATTTTGAGAAGTAAATGCGTTATTTATTG  
GTCCATGAAATGTGACTGTAAATATTCTTTGCTATACATTATGTCTATATATCTGCATTCATCCTCA  
ATGCCAAAAGTAAATCATTAGTCTTAATGATCATTTTAAAGTACAGGCAGTCCTCGCTTTCCTTG  
ATACCATGTTAACCGAAACTTGTGTATGTCAACACGGTGTCTTGCTTTGCTTGGTTAAGTGTGA  
GTTCTTCTCCCTTTTTTAAAGAGTTGTACAATGTTTTTTCAGTCGCCTACCGAATCAGGTCATAGA  
CTATGGAATTGACCCACCCACCAACATTTTTACAGCTACCCTGATTTCTGACCAGAAAGGAA  
AAAAAACTTTCCAGCTCTATCACACATTTTACCTACTCTTAACTTAGGAGGTATTACAAATAG  
CATTTTCTCATGTTCTCTTTCTGGCCTGTACCTCCCTGCTAAGCTTCCTCAGTGTTTCATCCTCACC  
TCATAGAGAGATGAAGTGAAGAGACAAACAGAAGTCATTTTCTTCTTACTTTAGTGGTTTCTGG  
TTTAGTTAGTTTGGGCCAAACTGTGGACAAGTACCTTTTCAGGTAACTTTTTTTTCTTATTTCTATG  
TCCTCAACACCTAGTGGAGTACGTAGCCAATAGTAGATGCTTAATAAACATTTCTTAAATTAATA  
TTGTTGACCTTTTCTGACCCTGTTCTTGACAGTAAGGTACATAATCTGCCTTCATCCCTTAGTCCT  
TAGGAACAGATAAAGTCATGGATATGAAAGTGATCACTGTCATTAATATCCACATTAATAATGCT  
CTTGATTTTAGTTTCTCCATAATCATTTTCCCTAAACAATGAACTCTGTTACCTTTTTTTTTAAAAT  
ATGCACAGTGAATATTACTGGTAGCCCAAATCTTCTAACATAAAAATTTCCATTTTGTAAAAGCTTC  
TGATAAGCATATATGTTATGAATTGAATGTTTGATTATTATACTTTAATATTCTTGAAAATATTGAT  
ACCTGGACTGGAAAGAAAACAGACAAAAGTAAATCTCAGAATAAATTAAGTCTTTAAACATGAA
